# Supplementary material for: Identification of common and specific cold resistance pathways from cold tolerant and non-cold tolerant mango varieties
Source: PeerJ. 2024 Oct 30;12:e18431. doi: 10.7717/peerj.18431 (PMC11531256; doi:10.7717/peerj.18431)
Supplement: Supplemental Information 3 [file peerj-12-18431-s003.xlsx]

## Sheet: Sheet1
Supplementary Table 1.The protein information of 43 ERFs.
#ID	log2FC	Regulated	NR_annotation	Gene abbr.
gene-LOC123213123	12.8152	up	ethylene-responsive transcription factor ERF109-like [Pistacia vera]	ERF109-1
gene-LOC123200303	12.1419	up	ethylene-responsive transcription factor ERF017-like [Pistacia vera]	ERF017-1
gene-LOC123201094	10.7505	up	ethylene-responsive transcription factor ERF017-like [Pistacia vera]	ERF017-2
gene-LOC123217626	9.34395	up	ethylene-responsive transcription factor 13-like [Pistacia vera]	ERF013
gene-LOC123216942	8.56165	up	ethylene-responsive transcription factor CRF6 [Pistacia vera]	ERF-CRF6
gene-LOC123207118	8.38213	up	ethylene-responsive transcription factor ERF109-like [Pistacia vera]	ERF109-2
gene-LOC123206476	7.60063	up	ethylene-responsive transcription factor ERF105-like [Pistacia vera]	ERF105-1
gene-LOC123224492	7.56232	up	ethylene-responsive transcription factor ERF071-like isoform X2 [Pistacia vera]	ERF071-X2
gene-LOC123197369	7.45519	up	ethylene-responsive transcription factor ERF105-like [Pistacia vera]	ERF105-2
gene-LOC123204123	7.20774	up	ethylene-responsive transcription factor 5-like [Pistacia vera]	ERF005
gene-LOC123207117	7.1957	up	ethylene-responsive transcription factor ERF109-like [Pistacia vera]	ERF109-3
gene-LOC123225968	7.03793	up	ethylene-responsive transcription factor ERF105-like [Pistacia vera]	ERF105-3
gene-LOC123205905	7.03499	up	ethylene-responsive transcription factor ERF105-like [Pistacia vera]	ERF105-4
gene-LOC123203067	7.02817	up	ethylene-responsive transcription factor ERF020-like [Pistacia vera]	ERF020
gene-LOC123225969	6.28676	up	ethylene-responsive transcription factor ERF105-like [Pistacia vera]	ERF105-5
gene-LOC123203893	6.27584	up	ethylene-responsive transcription factor 1A-like [Pistacia vera]	ERF1A-1
gene-LOC123199579	6.27501	up	ethylene-responsive transcription factor ERF109-like [Pistacia vera]	ERF109-4
gene-LOC123194312	6.26515	up	ethylene-responsive transcription factor ERF017-like [Pistacia vera]	ERF017-3
gene-LOC123208950	6.23528	up	ethylene-responsive transcription factor ERN1 [Pistacia vera]	ERF-ERN1
gene-LOC123216598	5.74587	up	ethylene-responsive transcription factor ERF071-like isoform X1 [Pistacia vera]	ERF071-X1
gene-LOC123222542	5.69373	up	ethylene-responsive transcription factor 4-like [Pistacia vera]	ERF004-1
gene-LOC123197055	5.69247	up	ethylene-responsive transcription factor 4-like [Pistacia vera]	ERF004-2
gene-LOC123199695	5.67824	up	ethylene-responsive transcription factor ERF109-like [Pistacia vera]	ERF109-5
gene-LOC123205909	5.52465	up	ethylene-responsive transcription factor ERF105-like [Pistacia vera]	ERF105-6
gene-LOC123207414	5.3388	up	ethylene-responsive transcription factor SHINE 2-like [Pistacia vera]	ERF-SHINE2-1
gene-LOC123194715	5.22105	up	ethylene-responsive transcription factor SHINE 2-like [Pistacia vera]	ERF-SHINE2-2
gene-LOC123210004	5.1032	up	ethylene-responsive transcription factor 1A-like [Pistacia vera]	ERF1A-2
gene-LOC123207120	4.17111	up	ethylene-responsive transcription factor ERF109-like [Pistacia vera]	ERF109-6
gene-LOC123193405	4.06606	up	ethylene-responsive transcription factor 12 [Pistacia vera]	ERF012-1
gene-LOC123213673	3.63582	up	ethylene-responsive transcription factor ABR1-like [Pistacia vera]	ERF012-ABR1-1
gene-LOC123218252	3.63264	up	ethylene-responsive transcription factor 12 [Pistacia vera]	ERF012-2
gene-LOC123223187	3.59803	up	ethylene-responsive transcription factor ERF071-like isoform X1 [Pistacia vera]	ERF071-X1-2
gene-LOC123219582	3.47289	up	ethylene-responsive transcription factor 4-like [Pistacia vera]	ERF004-3
gene-LOC123200431	3.4517	up	ethylene-responsive transcription factor TINY-like [Pistacia vera]	ERF-TINY
gene-LOC123198866	3.31875	up	ethylene-responsive transcription factor ERF110-like [Pistacia vera]	ERF110
gene-LOC123229067	2.92915	up	ethylene-responsive transcription factor ABR1-like [Pistacia vera]	ERF012-ABR1-2
gene-LOC123197246	2.88085	up	ethylene-responsive transcription factor CRF4-like [Pistacia vera]	ERF-CRF4
gene-LOC123203652	2.53284	up	ethylene-responsive transcription factor RAP2-13-like [Pistacia vera]	ERF-RAP2-13
gene-LOC123201495	2.48375	up	ethylene-responsive transcription factor 4 [Pistacia vera]	ERF004-4
gene-LOC123210003	2.46017	up	ethylene-responsive transcription factor 5-like [Pistacia vera]	ERF005
gene-LOC123209051	2.37153	up	ethylene-responsive transcription factor ERN1-like [Pistacia vera]	ERF-ERN1-2
gene-LOC123192397	2.2836	up	ethylene-responsive transcription factor 4-like [Pistacia vera]	ERF004-5
gene-LOC123211013	2.21118	up	ethylene-responsive transcription factor ERF061 [Pistacia vera]	ERF061
