# Supplementary material for: Identification of common and specific cold resistance pathways from cold tolerant and non-cold tolerant mango varieties
Source: PeerJ. 2024 Oct 30;12:e18431. doi: 10.7717/peerj.18431 (PMC11531256; doi:10.7717/peerj.18431)
Supplement: Supplemental Information 4 [file peerj-12-18431-s004.xls]

## Sheet: Sheet1
ITEM TO CHECK	IMPORTANCE	CHECKLIST
EXPERIMENTAL DESIGN
Definition of experimental and control groups	E	Line 124
Number within each group	E	Line 128-130
Assay carried out by core lab or investigator's lab?	D	Line 413-415
Acknowledgement of authors' contributions	D	None
SAMPLE
Description	E
Volume/mass of sample processed	D	Line 125-126
Microdissection or macrodissection	E	None
Processing procedure	E
If frozen - how and how quickly?	E	Line 137
If fixed - with what, how quickly?	E	None
Sample storage conditions and duration (especially for FFPE samples)	E	Line 137
NUCLEIC ACID EXTRACTION
Procedure and/or instrumentation	E
Name of kit and details of any modifications	E	Line 146-147
Source of additional reagents used	D	None
Details of DNase or RNAse treatment	E	Line 148
Contamination assessment (DNA or RNA)	E	Line 149-151
Nucleic acid quantification	E	Line 239-240
Instrument and method	E	Line 149-151
Purity (A260/A280)	D	Line 239-240
Yield	D	Line 239-240
RNA integrity method/instrument	E	Line 149-151
RIN/RQI or Cq of 3' and 5' transcripts	E	Line 149-151
Electrophoresis traces	D	None
Inhibition testing (Cq dilutions, spike or other)	E	None
REVERSE TRANSCRIPTION
Complete reaction conditions	E
Amount of RNA and reaction volume	E	Line 153
Priming oligonucleotide (if using GSP) and concentration	E	Line 154-158
Reverse transcriptase and concentration	E	Line 154-158
Temperature and time	E	Line 154-158
Manufacturer of reagents and catalogue numbers	D	Line 154-158
Cqs with and without RT	D*	None
Storage conditions of cDNA	D	None
qPCR TARGET INFORMATION
If multiplex, efficiency and LOD of each assay.	E	None
Sequence accession number	E	Table 1
Location of amplicon	D
Amplicon length	E	Table 1
In silico specificity screen (BLAST, etc)	E	None
Pseudogenes, retropseudogenes or other homologs?	D	None
Sequence alignment	D	None
Secondary structure analysis of amplicon	D	None
Location of each primer by exon or intron (if applicable)	E
What splice variants are targeted?	E	None
qPCR OLIGONUCLEOTIDES
Primer sequences	E	Table 1
RTPrimerDB Identification Number	D	None
Probe sequences	D**	None
Location and identity of any modifications	E	None
Manufacturer of oligonucleotides	D	Sangon Biotech
Purification method	D	HAP
qPCR PROTOCOL
Complete reaction conditions	E
Reaction volume and amount of cDNA/DNA	E	Line 202-203
Primer, (probe), Mg++ and dNTP concentrations	E	Line 202-203
Polymerase identity and concentration	E	Line 202-203
Buffer/kit identity and manufacturer	E	Line 202-203
Exact chemical constitution of the buffer	D	Line 202-203
Additives (SYBR Green I, DMSO, etc.)	E	Line 202-203
Manufacturer of plates/tubes and catalog number	D	Line 202-203
Complete thermocycling parameters	E	Line 203
Reaction setup (manual/robotic)	D	Line 202
Manufacturer of qPCR instrument	E	Line 202
qPCR VALIDATION
Evidence of optimisation (from gradients)	D	None
Specificity (gel, sequence, melt, or digest)	E	None
For SYBR Green I, Cq of the NTC	E	None
Standard curves with slope and y-intercept	E
PCR efficiency calculated from slope	E	None
Confidence interval for PCR efficiency or standard error	D	None
r2 of standard curve	E	None
Linear dynamic range	E
Cq variation at lower limit	E	None
Confidence intervals throughout range	D	None
Evidence for limit of detection	E	None
If multiplex, efficiency and LOD of each assay.	E	None
DATA ANALYSIS
qPCR analysis program (source, version)	E
Cq method determination	E	Tm
Outlier identification and disposition	E	None
Results of NTCs	E	Negative
Justification of number and choice of reference genes	E	β-actin
Description of normalisation method	E	△Ct
Number and concordance of biological replicates	D	3
Number and stage (RT or qPCR) of technical replicates	E	None
Repeatability (intra-assay variation)	E	None
Reproducibility (inter-assay variation, %CV)	D	P value
Power analysis	D	None
Statistical methods for result significance	E	t test
Software (source, version)	E	StepOne Software v2.1
Cq or raw data submission using RDML	D	Supplemental Files
Table 1. MIQE checklist for authors, reviewers and editors. All essential information (E) must be submitted with the manuscript. Desirable
information (D) should be submitted if available. If using primers obtained from RTPrimerDB, information on qPCR target, oligonucleotides,
protocols and validation is available from that source.
*: Assessing the absence of DNA using a no RT assay is essential when first extracting RNA. Once the sample has been validated as
RDNA-free, inclusion of a no-RT control is desirable, but no longer essential.
**: Disclosure of the probe sequence is highly desirable and strongly encouraged. However, since not all commercial pre-designed assay
vendors provide this information, it cannot be an essential requirement. Use of such assays is advised against.
